# Supplementary material for: An efficient electrochemical sensor based on the Ce-MOF/g-C3N5 composite for the detection of nitrofurazone
Source: Royal Society of Chemistry journal article supplement (doi:10.1039/d3ay02221h), 2024-01-01
Supplement: d3ay02221h1.pdf [file d3ay02221h1.pdf]

## Supporting Information

**An efficient electrochemical sensor based on Ce-MOF/g-C<sub>3</sub>N<sub>5</sub>  
composite for detection of nitrofurazone**

**Jianxia Gu<sup>\*a</sup>, Yiqiong Jia<sup>a</sup>, Zhanbin Jin<sup>a</sup>, Tingting Wei<sup>a</sup>, Yongxia Li<sup>a</sup>**

*<sup>a</sup>Department of chemistry, Xinzhou Normal University, Xinzhou, Shanxi, China*

## Figures

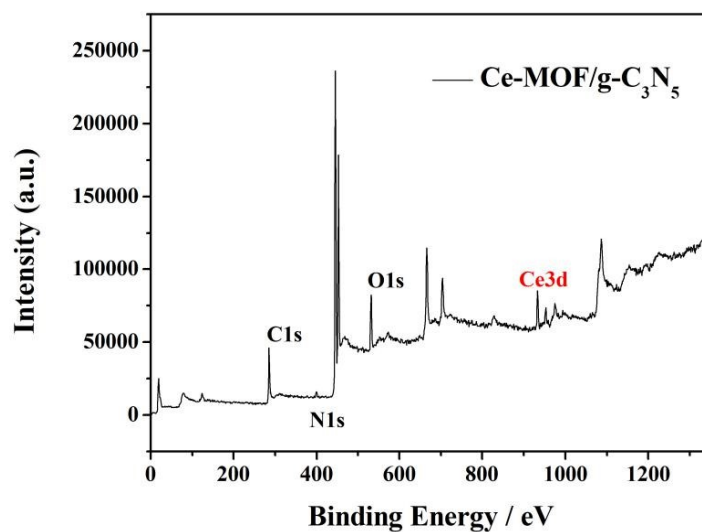

Fig. S1. XPS spectrum of Ce-MOF/g-C<sub>3</sub>N<sub>5</sub>.

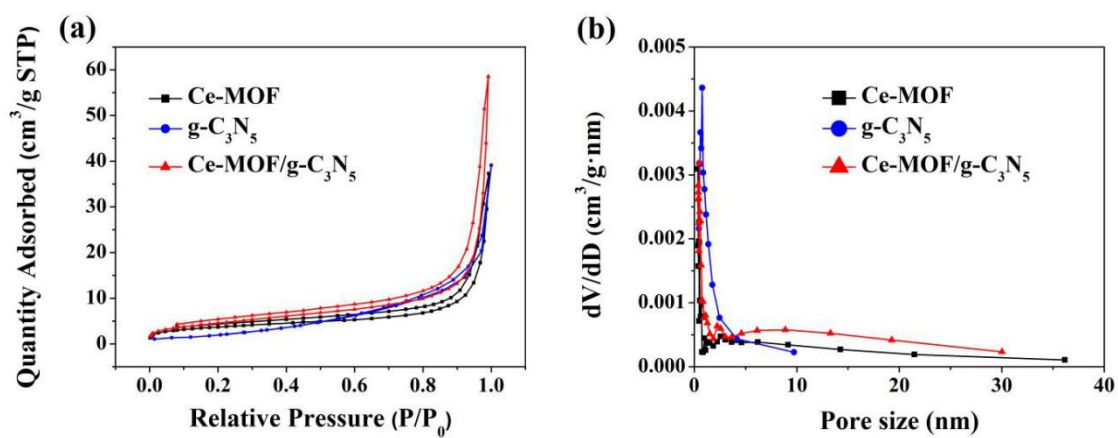

Fig. S2. N<sub>2</sub> adsorption-desorption isotherms (a) and corresponding pore size distribution curves (b) of Ce-MOF, g-C<sub>3</sub>N<sub>5</sub> and Ce-MOF/g-C<sub>3</sub>N<sub>5</sub>.

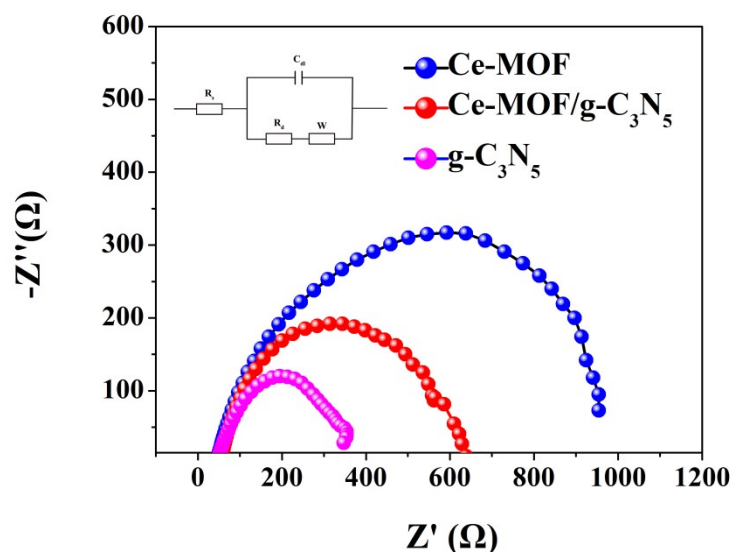

**Fig. S3.** EIS of Ce-MOF, g-C<sub>3</sub>N<sub>5</sub> and Ce-MOF/g-C<sub>3</sub>N<sub>5</sub> recorded in 5.0 mM Fe(CN)<sub>6</sub><sup>3-</sup>/<sup>4-</sup> with 0.1 M KCl, the frequency range from 0.1 Hz to 10.0 kHz (Inset: the Randles circuit).

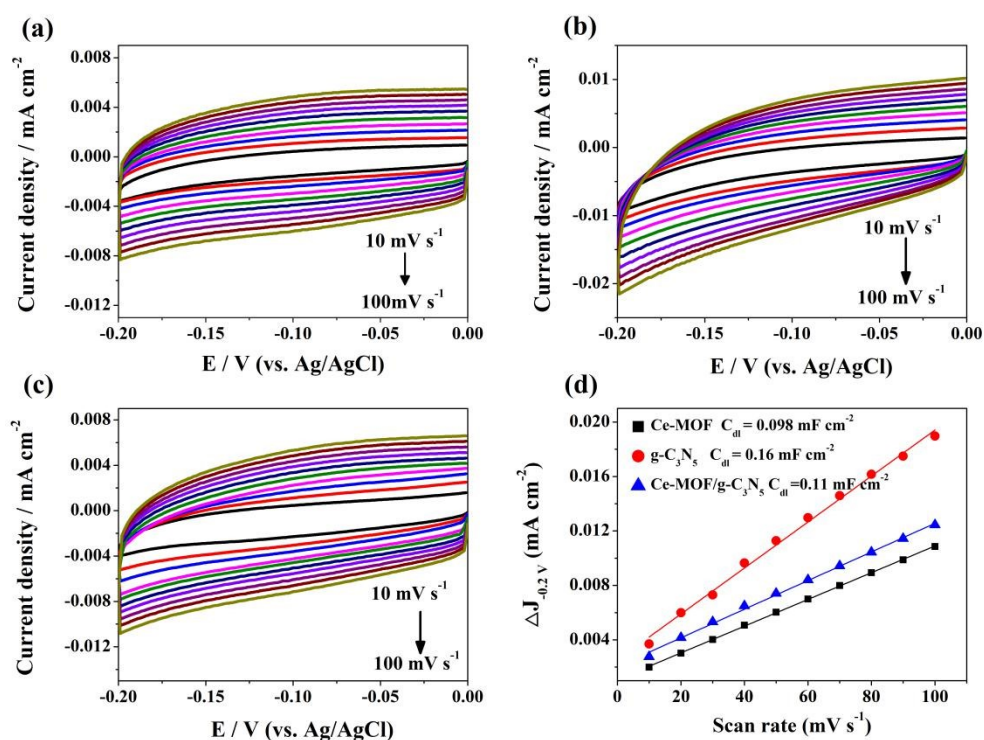

**Fig. S4.** The CV curves under different scan rates (10 mV/s to 100 mV/s) for Ce-MOF (a), g-C<sub>3</sub>N<sub>5</sub> (b), Ce-MOF/g-C<sub>3</sub>N<sub>5</sub> (c) in 0.1 M PBS containing 40 μM nitrofurazone. (d) double-layer capacitance ( $C_{dl}$ ) of Ce-MOF, g-C<sub>3</sub>N<sub>5</sub>, Ce-MOF/g-C<sub>3</sub>N<sub>5</sub> at a given potential of -0.10 V vs. Ag/AgCl in in 0.1 M PBS containing 40 μM nitrofurazone.

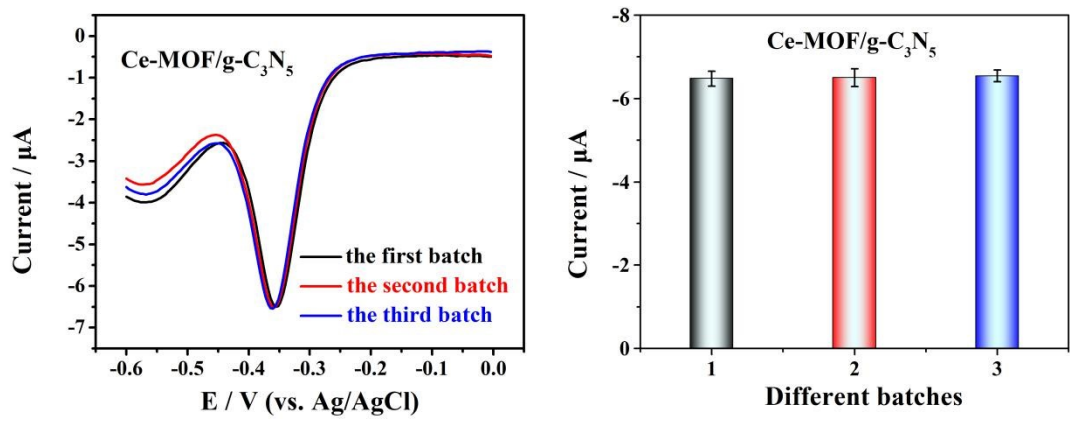

**Fig. S5.** The DPV responses for detection of nitrofurazone in 0.1 M PBS (pH=6.0) containing 50  $\mu\text{M}$  nitrofurazone on different batches of Ce-MOF/g- $\text{C}_3\text{N}_5$  composite.

**Table S1.** The specific surface area and average pore diameter of Ce-MOF, g-C<sub>3</sub>N<sub>5</sub> and Ce-MOF/g-C<sub>3</sub>N<sub>5</sub>

| Samples                                | Specific surface area (m <sup>2</sup> /g) | Average pore diameter (nm) |
|----------------------------------------|-------------------------------------------|----------------------------|
| Ce-MOF                                 | 13.43                                     | 17.2                       |
| g-C <sub>3</sub> N <sub>5</sub>        | 8.70                                      | 23.2                       |
| Ce-MOF/g-C <sub>3</sub> N <sub>5</sub> | 17.14                                     | 22.1                       |

**Table S2.** Interferences of some inorganic and organic species on the peak currents of nitrofurazone (40 μM )

| Interferential species | Concentration (μM ) | Peak current change (%) |
|------------------------|---------------------|-------------------------|
| Ascorbic acid (AA)     | 40                  | 2.0                     |
| Dopamine (DA)          | 40                  | 2.3                     |
| Glucose                | 40                  | 4.8                     |
| Urea (UA)              | 40                  | 3.4                     |
| Metronidazole          | 40                  | 1.8                     |
| Ca <sup>2+</sup>       | 1 mM                | -0.6                    |
| Mg <sup>2+</sup>       | 1 mM                | -0.4                    |
| Fe <sup>3+</sup>       | 1 mM                | 0.2                     |
| Na <sup>+</sup>        | 40 mM               | 1.9                     |
| K <sup>+</sup>         | 40 mM               | 1.4                     |
